# Supplementary material
Source: MDPI journal article supplement (https://www.mdpi.com/2073-4441/14/8/1227)
Supplement: s1 [file s1 › water-1625310-Supplementary.pdf]

# Supplementary Materials

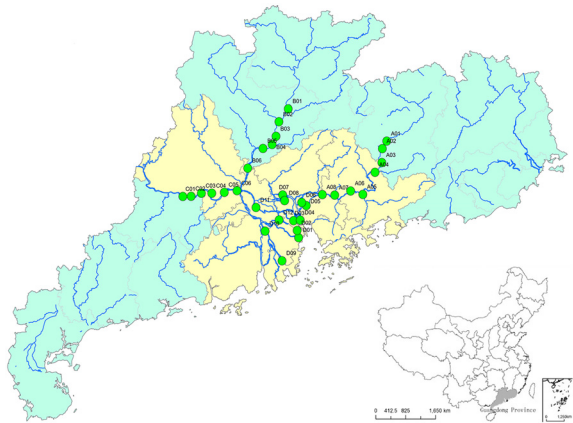

Figure S1 Sampling sites for microbes of the Pearl River basin

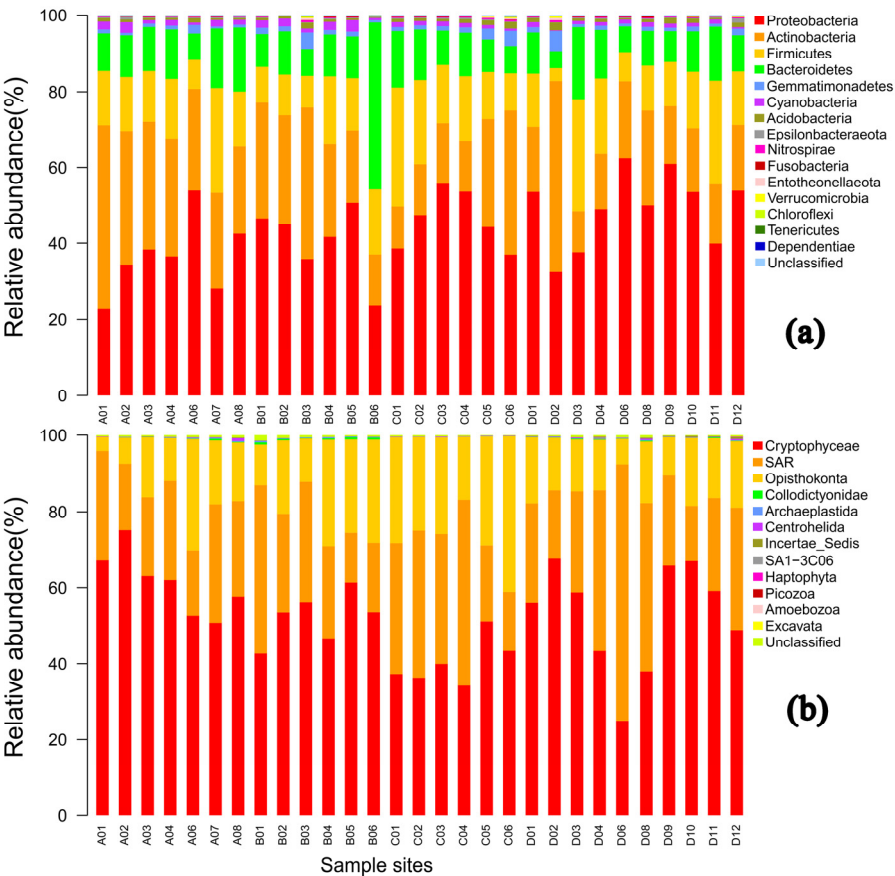

Figure S2 Taxonomic composition of the bacterial communities (a) and the microeukaryotic communities (b) in 29 samples. (a) Relative abundance of the phyla. (b) Relative abundance of the lineages.

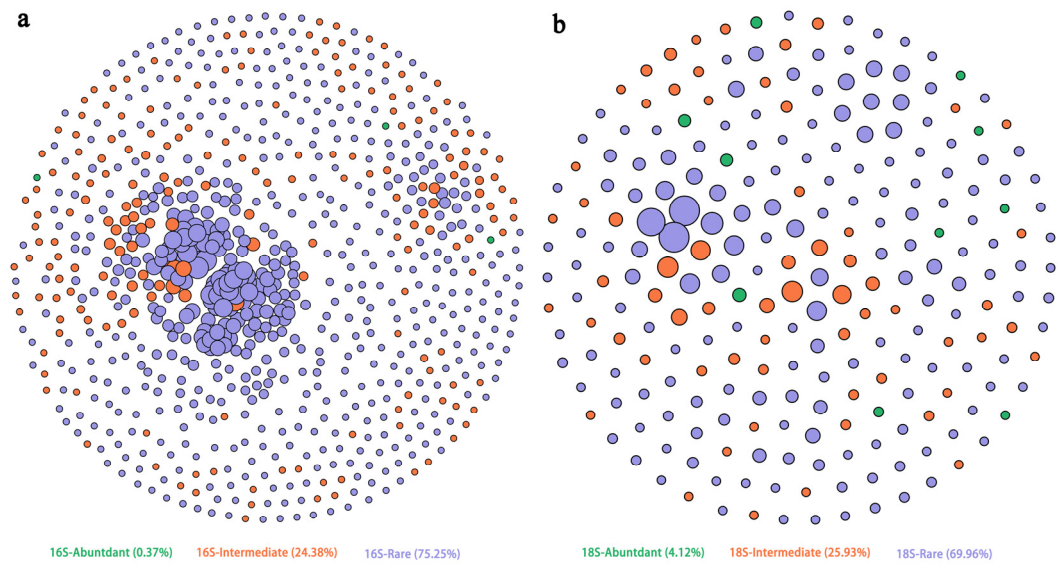

**Figure S3 The co-occurrence network patterns among OTUs of bacteria (a) and microeukaryotes (b) colored by each subcommunity;**
